# Supplementary material
Source: Research Square preprint supplement (doi:10.21203/rs.3.rs-9834795/v1)
Supplement: Supplementary file 1 [file 07eef6a56ee3358b8ac73968.docx]

**Ebola gene optimized**

ATGGCGCGCGGCAAAAAAATTGGCTATAGCGGCCTGAAAAGCCGCCAGAC     50
CAAAGATAAAGCGGCGGAAGCGGCGGCGCCGGCGGCGCCGGCGCCGGCGC     100
CGGAAGTGACCCCGGCGGCGGCGCCGGTGGTGGCGCCGGCGCCGGCGCCG     150
GCGGAAGCGAAAAAAAGCGAAGAAAGCGATGATATG**GGG**TTTGGCCTG**TT**     200
**CGAC**GTGGCGAAAAACGTGGCGGCGGAAAGCGCGGCGGAAGCGGCGGCGC     250
CGGCGGAAGAAGCGGCGGCGGCGCCGGCGCCGGCGCCGGTGGTGAAAGAA     300
GCGAAAAAAGAAGCGGCGGCGAAAATGGATAGCCGCCCGCAGAAAATTTG     350
GATGGCGCCGAGCCTGACCGAAAGCGATATGGATTATCATAAAATTCTGA     400
CCGCGGGCCTGAGCGTGCAGCAGGGCATTGTGCGCCAGCGCGTGATTCCG     450
GTGTATCAGGTGAACAACCTGGAAGAAATTTGCCAGCTG**ATAATA**CAGGC     500
G**TTCGAGGCT**GGCGTG**GAC**TTTCAGGAATTT**CTC**CTGATTCATCAGGGCA     550
TGCATATGGTGGCGGGCCATGATGCGAACGATGCGGTGATTAGCAACAGC     600
GTG**GCT**CAGGCGCGC**TTC**AGCGGCCTG**CTA**ATTGTGAAAACCGTGCTGGA     650
TCATATTCTGCAGAAAACCGAACGCGGCGTGCGCCTGCATCCGCTGGCGC     700
GCACCGCGAAAGTGAAAAACGAAGTGAACAGCTTTCTGAGCAGCCTGGCG     750
AAACATGGCGAA**TACGCT**CCG**TTC**GCGCGC**CTA**CTGAACCTGAGCGGCGT     800
GAACAACCTGGAACATGGCCTGTTTCCGCAGCTGAGCGCGATTGCGCTGG     850
GCGTGGCGACCGCGCATGGCAGCACCCTGGCGGGCGTGAACGTGGGCGAA     900
CAGTATCAGCAGCTGCGCGAAGCGGCGACCCAGCTGCAGCAGTATGCGGA     950
AAGCCGCGAACTGGATCATCTGGGCCTGGATGATCAGGAAAAAAAAATTC     1000
TGATGAACTTTCATCAGAAAAAAAACGAAATTAGCTTTCAGCAGACCAAC     1050
GCGATGGTGACCCTGCGCAAAGAACGCCTGGCGAAACTGACCGAAGCGAT     1100
TACCGCGGCGAGCCTGCCGAAAACCAGCGGCCATGATGATGATGATGATA     1150
TTCCGTTTCCGGGCCCGATTAACGATGATGATAACCCGGGCCATCAGGAT     1200
GATGATCCGACCGATAGCCAGGATACCACCATTCCGGATGTGGTGGTGGA     1250
TCCGGATGATGGCAGCTATGGCGAATATCAGAGCTATAGCGAAAACGGCA     1300
TGAACGCGCCGGAT**GACCTC**GTGCTG**TTCGAC**CTGGATGATGAAGATACC     1350
AAACCGGTGCCGAACCGCAGCACCAAAGGCGGCCAGCAGAAAAACAGCCA     1400
GAAAGGCCAGCATATTGAAGGCCGCCAGACCCAGAGCCGCCCGATTCAGA     1450
ACGTGCCGGGCCCGCATCGCACCATTCATCATGCGAGCGCGCCGCTGACC     1500
GATAACGATCGCCGCAACGAACCGAGCGGCAGCACCAGCCCGCGCCTGAC     1550
CCCGATTAACGAAGAAGCGGATCCGCTGGATGATGCGGATGATGAAACCA     1600
GCAGCCTGCCGCCGCTGGAAAGCGATGATGAAGAACAGGATCGCGATGGC     1650
ACCAGCAACCGCACCCCGACCGTGGCGCCGCCGGCGCCGGTGTATCGCGA     1700
TCATAGCGAAAAAAAAGAACTGCCGCAGGATGAACAGCAGGATCAGGATC     1750
ATACCGAAAAAGAAGCGATGAACGAAGAAAACCGCTTTGTGACC**CTC**GAT     1800
GGCCAGCAG**TTCTAC**TGGCCGGTGATGAACCATAAAAACAAATTTATGGC     1850
GATTCTGCAGCATCATTGCCCGGGCCCGGGCCAGCTGAGCGCGATTGCGC     1900
TGGGCGTGTATCAGGTGAACAACCTGGAAGAAATTCGCCTGGAAGAACTG     1950
**TTACCA**GCGGTG**TTC**CCGCAGCTGAGCGCG**ATA**GCGCTG**TTC**CTG**TCGTT**     2000
**C**GCGAGCCTG**TTC**CTGCAGACCAACGCGATGGTGACCCTGCGCGCGGCGT     2050
ATATTAGCTTTCAGCAGACCAACGCGATGGTGACCCTGCGCAAAGAAGTG     2100
CAGCAGGGCATTGTGCGCCAGCGCGTGATTCCGGTGTATCAGTTTGCGCG     2150
CCTGCTGAACCTGAGCGGCGTGAACAACCTGGAACATCTGAGCGCGATTG     2200
CGCTGGGCGTGGCGACCGCGCATGGCAGCACCCGCCTGGAAGAACTGCTG     2250
CCGGCGGTGAGCAGCGGCAAAAACATTGATGCGAACGATGCGGTGATTAG     2300
CAACAGCGTGGCGCAGGCGCGCCATCATCATCATCATCAT
