# Supplementary material
Source: Research Square preprint supplement (doi:10.21203/rs.3.rs-9834795/v1)
Supplement: Supplementary file 2 [file 1582e4e390d8fef33aefc5b7.xlsx]

## Sheet: Sheet1
Peptides	Antigenecity	Allergenecity	Alleles
QLSAIALGV	Antigen	Non-allergen	HLA-A*02:01, HLA-A*02:03, HLA-A*02:06, HLA-A*68:02
YQVNNLEEI	Antigen	Non-allergen	HLA-A*02:01, HLA-A*02:03, HLA-A*02:06
RLEELLPAV	Antigen	Non-allergen	HLA-A*02:01, HLA-A*02:03, HLA-A*02:06
FPQLSAIAL	Antigen	Non-allergen	HLA-B*07:02, HLA-B*35:01, HLA-B*53:01
FLSFASLFL	Antigen	Non-allergen	HLA-A*02:01, HLA-A*02:03, HLA-A*02:06
QTNAMVTLR	Antigen	Non-allergen	HLA-A*31:01, HLA-A*33:01, HLA-A*68:01
