# Supplementary material
Source: Research Square preprint supplement (doi:10.21203/rs.3.rs-9834795/v1)
Supplement: Supplementary file 2 [file 2470769b89a93d047496da3c.docx]

**Physio-Chemical Property of Vaccine**

**Number of amino acids:** 780

**Theoretical pI:** 5.16

**Molecular weight:** 85049.88

**Total number of negatively charged residues (Asp + Glu):** 109

**Total number of positively charged residues (Arg + Lys):** 70

**Formula:** C3710H5869N1069O1191S17

**Total number of atoms:** 11856

**Extinction coefficients:**

Extinction coefficients are in units of M-1 cm-1, at 280 nm measured in water.

Ext. coefficient 31985

Abs 0.1% (=1 g/l) 0.376, assuming all pairs of Cys residues form cystines

Ext. coefficient 31860

Abs 0.1% (=1 g/l) 0.375, assuming all Cys residues are reduced

**Estimated half-life:**

The N-terminal of the sequence considered is M (Met).

The estimated half-life is: 30 hours (mammalian reticulocytes, in vitro).

>20 hours (yeast, in vivo).

>10 hours (Escherichia coli, in vivo).

**Instability index:**

The instability index (II) is computed to be 46.94

This classifies the protein as unstable.

**Aliphatic index:** 81.01

**Grand average of hydropathicity (GRAVY):**-0.507
