# Supplementary material
Source: Research Square preprint supplement (doi:10.21203/rs.3.rs-9834795/v1)
Supplement: Supplementary file 3 [file 25d2108b28b509a8b052f211.docx]

**Population Coverage Calculation Result**

| **population/area** | **Class I** | | |
| --- | --- | --- | --- |
| **coveragea** | **average_hitb** | **pc90c** |
| [World](https://tools.iedb.org/population/result/#World) | 63.54% | 2.07 | 0.27 |
|  |  |  |  |
| **Average** | **63.54** | **2.07** | **0.27** |
| **Standard deviation** | **0.0** | **0.0** | **0.0** |

a projected population coverage
b average number of epitope hits / HLA combinations recognized by the population
c minimum number of epitope hits / HLA combinations recognized by 90% of the population

***Population: World***

| **MHC class** | **Coverage** | **Average hit** | **PC90** |
| --- | --- | --- | --- |
| I | 63.54% | 2.07 | 0.27 |
| 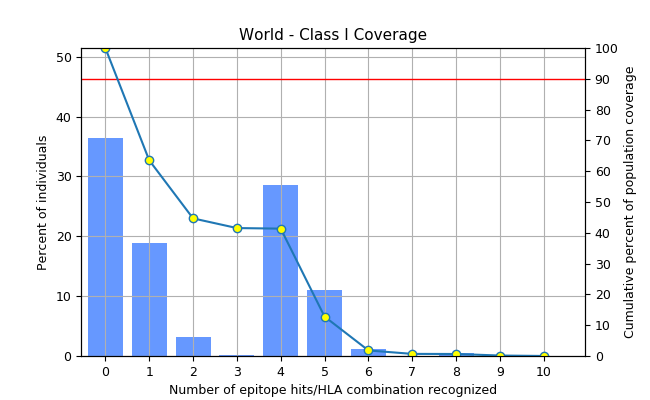 | | | |
