# Supplementary material
Source: Research Square preprint supplement (doi:10.21203/rs.3.rs-9834795/v1)
Supplement: Supplementary file 6 [file 4c034fe58282f8174df0b93b.docx]

**Toxicity Result of Vaccine**

| ------------ Prediction result of ToxDL------------ |
| --- |

| **ToxDL** | **score** |
| --- | --- |
| **Being toxic protein** | **0.00047742383** |

|  |
| --- |


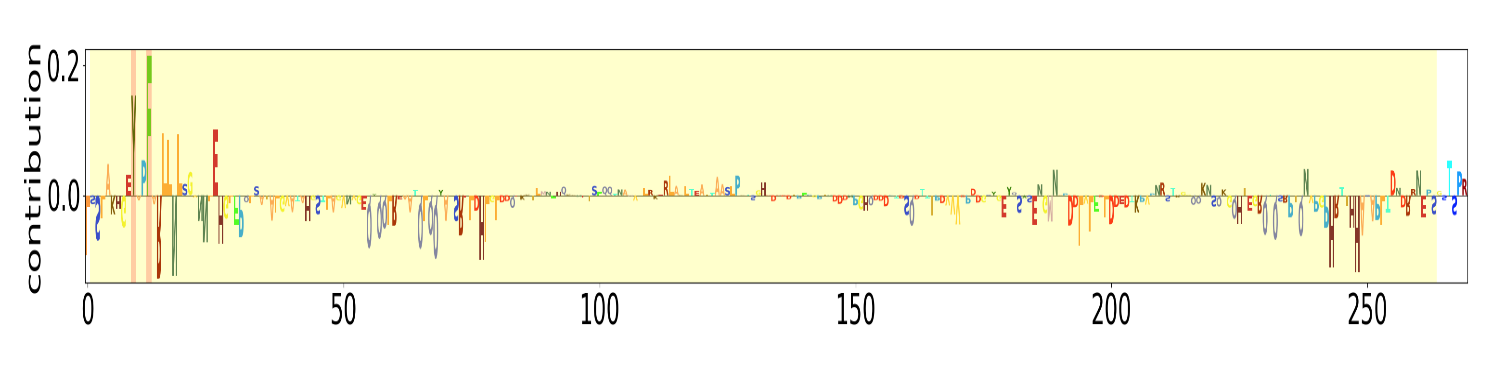


| ------------ Any toxic domain detected by InterProScan in this protein------------ |
| --- |

| **No toxic domain is detected in this protein** |
| --- |
