# Supplementary material
Source: Research Square preprint supplement (doi:10.21203/rs.3.rs-9834795/v1)
Supplement: Supplementary file 7 [file 3f91d727350eb443e1fa6975.xlsx]

## Sheet: Sheet1
Peptides	Alleles	Antigenecity	Allergenecity
ISFQQTNAMVTLRKE	HLA-DRB1*01:01
	HLA-DRB1*07:01
	HLA-DRB1*09:01	Antigen	Non-allergen
	HLA-DRB5*01:01
	HLA-DRB1*13:02
VQQGIVRQRVIPVYQ	HLA-DRB1*13:02
	HLA-DRB4*01:01	Antigen	Non-allergen
	HLA-DRB1*01:01
FARLLNLSGVNNLEH	HLA-DRB1*01:01	Antigen	Non-allergen
	HLA-DRB1*13:02
	HLA-DRB1*04:05
LSAIALGVATAHGST	HLA-DQA1*05:01, DQB1*03:01	Antigen	Non-allergen
	HLA-DRB1*01:01
RLEELLPAVSSGKNI	HLA-DRB1*01:01	Antigen	Non-allergen
	HLA-DRB5*01:01
DANDAVISNSVAQAR	HLA-DRB1*13:02	Antigen	Non-allergen
	HLA-DRB3*02:02
