# Supplementary material
Source: Research Square preprint supplement (doi:10.21203/rs.3.rs-9834795/v1)
Supplement: Supplementary file 7 [file 7af852dbbdba56f6134cd932.pdf]

# C-IMMSIM simulation results

May 22, 2026

## Abstract

This document includes the plots relative to the simulation and the outcome of the epitope/peptide prediction used.

Produced by the C-IMMSIM Online server available at  
<http://c-immsim.iac.rm.cnr.it> (alias to <http://kraken.iac.rm.cnr.it/C-IMMSIM>)

CITATIONS: For publication of results, please cite the following:

Nicolas Rapin, Ole Lund, Massimo Bernaschi, Filippo Castiglione. Computational Immunology Meets Bioinformatics: The Use of Prediction Tools for Molecular Binding in the Simulation of the Immune System. PLoS ONE 5(4): e9862  
doi:10.1371/journal.pone.0009862, 2010

A retrospective validation

In-silico evaluation of adenoviral COVID-19 vaccination protocols: Assessment of immunological memory up to 6 months after the third dose. P. Stolfi, F. Castiglione, E. Mastrostefano, I. Di Biase, S. Di Biase, G. Palmieri, A. Prisco. Frontiers in Immunology, 13 (2022) doi: 10.3389/fimmu.2022.998262  
<https://www.frontiersin.org/articles/10.3389/fimmu.2022.998262>

An in vivo validation

Identification and validation of viral antigens sharing sequence and structural homology with tumor associated antigens (TAAs). C. Ragone, C. Manolio, B. Cavalluzzo, A. Petrizzo, A. Mauriello, M-L. Tornesello, F. M. Buonaguro, F. Castiglione, L. Vitagliano, M. Ruvo, M. Tagliamonte, L. Buonaguro. Journal for ImmunoTherapy of Cancer. 9:e002694 (2021)  
<https://jitc.bmj.com/content/9/5/e002694>

Original C-IMMSIM model: [www.iac.cnr.it/~filippo/c-immsim](http://www.iac.cnr.it/~filippo/c-immsim)

GETTING HELP:

Scientific problems: Filippo Castiglione ([filippo dot castiglione at cnr dot it](mailto:filippo.castiglione@iac.cnr.it))

Technical problems: Ilaria Gonnella ([ilaria dot gonnella at cnr dot it](mailto:ilaria.gonnella@iac.cnr.it))

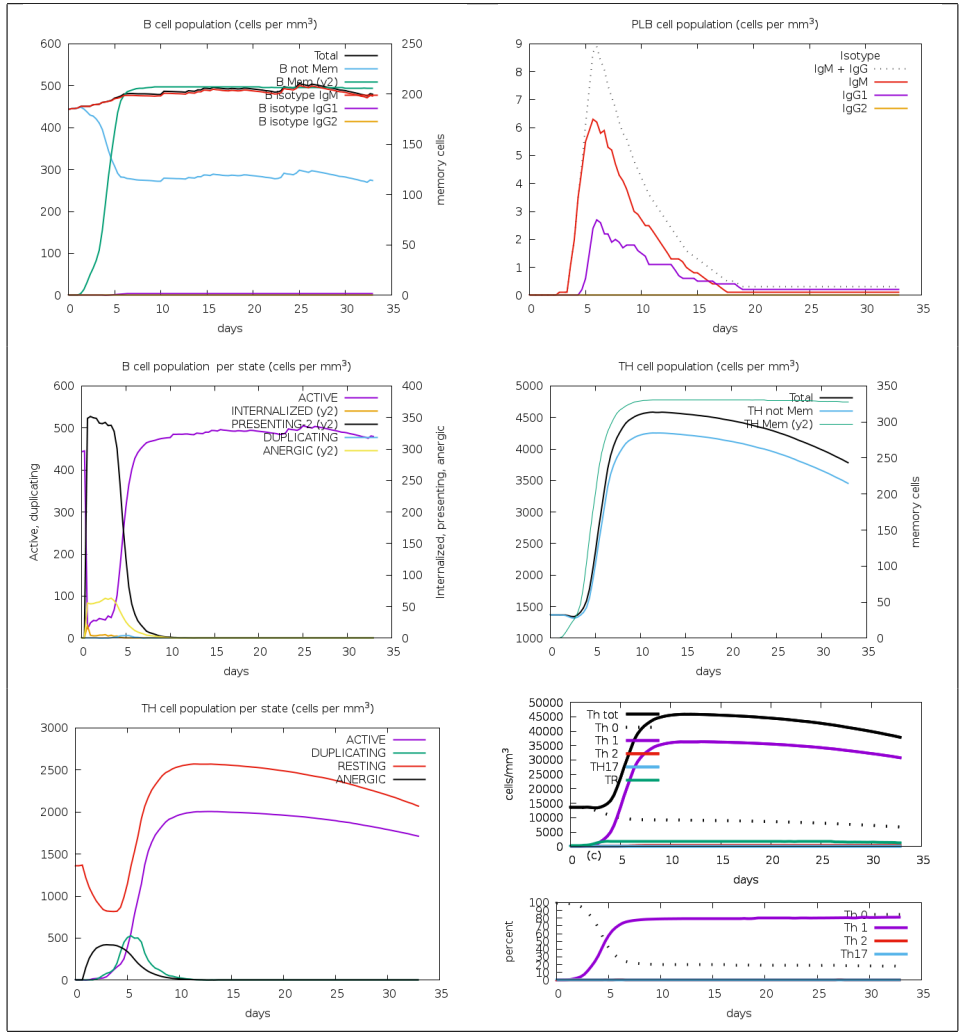

Figure 1: Cell counts shown. Legend: Act=active, Intern=internalized the Ag, Pres II = presenting on MHC II, Dup = in the mitotic cycle, Anergic = anergic, Resting = not active.

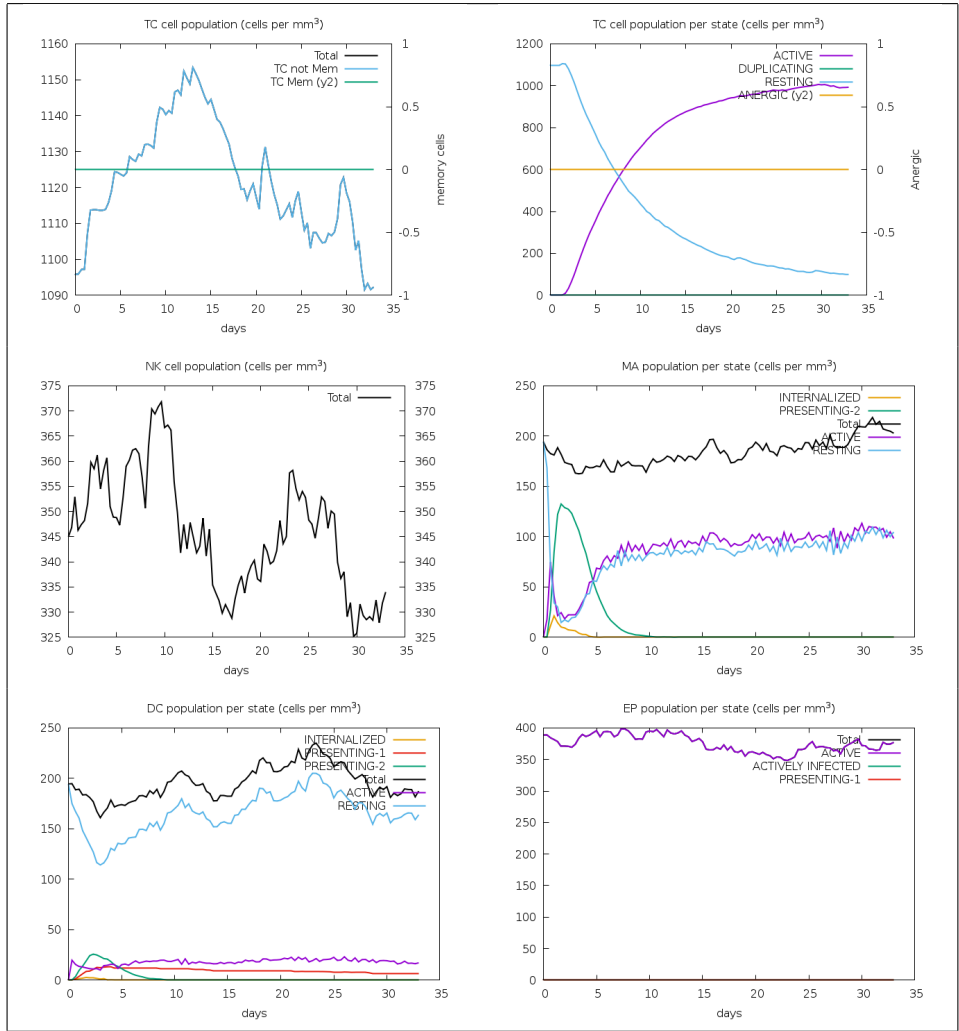

Figure 2: Legend: symbols as figure above.

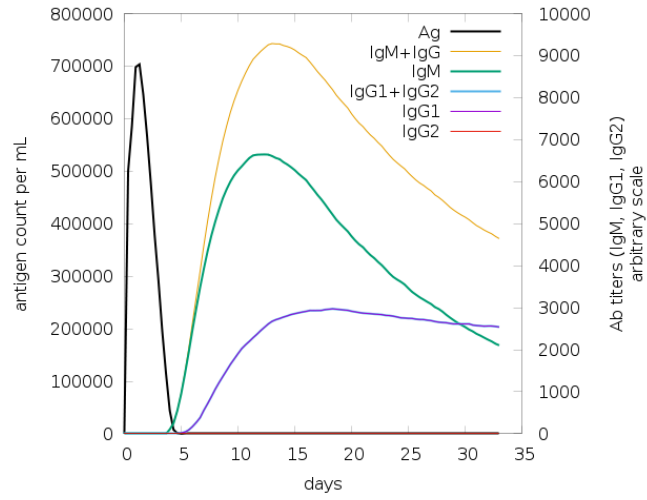

Figure 3: The virus, the immunoglobulins and the immunocomplexes.

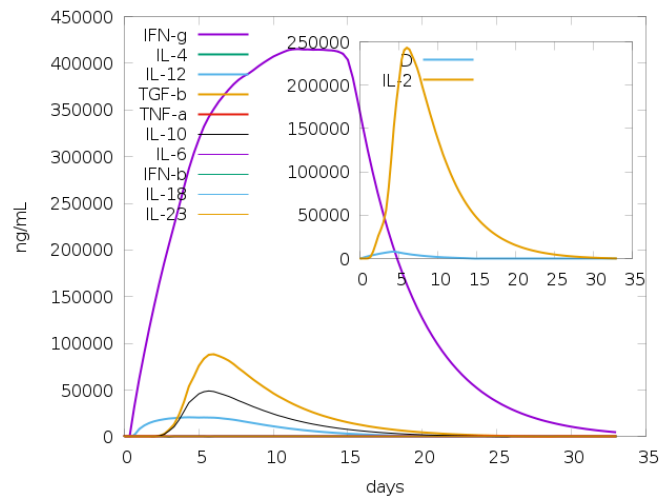

Figure 4: Concentration of cytokines and interleukins. Inset plot shows danger signal together with leukocyte growth factor IL-2.



Allele: A0101  
Pseudo sequence: KAVHAEQRNKAQTRA  
Threshold: 9.456400  
Max score: 29.236000

-----  
Antigen sequence file: /opt/lampp/htdocs/C-IMMSIM/Jobs/input/50712\_20260522-092940\_5\_XkLfjnfTr3nx.FSA\_1\_001  
-----

MARGKKIGYSGLSRQTKDKAAEAAAAPAPAPAEVTPAAAPVVAPAPAPAEAKKSEESDDMGFLFDVAKNVAESAAE  
AAAPAEAAAAPAPAPVVKEAKKEAAKMDSRPQKIWMAPSLTESMDYHKILTAGLSVQQGIVRQVIVPYQVNNLEEI  
CQLIIQAFEAGVDFQEFLLIHQGMHVMAGHDANDAVISNSVAQARFSGLLIVKTVLDHILKQTERGVRLHPLARTAKVKN  
EVNSFLSSLAKHGEYAPFARLLNLSGVNLEHGLFPQLSAIALGVATAHGSTLAGVNVGEQYQQLREAAATLQQYAESRE  
LDHLGLDDQEKKILMNFHQKNEISFQQTAMVTLRKRERLAKLTEAITAASLPKTSGHDDDDIPFPGPINDDDNPGHQD  
DDPTDSQDTTIPDVVVDVDDGSYGEYQSYSENGMNPDDLVLFDLDEEDTKPVPNRSTKGGQKNSQKQGHIEGRQTQSR  
PIQNVPGPHRTIHHASAPLTDNDRRNEPSGSTSPRLTPIINEEADPLDDADDETSLLPPLSDDEEQDRDGTNRTPTVAP  
PAPVYRDHSEKKELPQDEQQDQDHEKEAMNEENRFVTLDGQFYWPVMNHKNKFMAILQHHCPPGQLSAIALGVYQVNVN  
NLEEIRLEELLPAVFPQLSAIALFLSFASLFLQTNAMVTLRAAYISFQQTAMVTLRKEVQGGIVRQVIVPYQFARLLN  
LSGVNLEHLSAIALGVATAHGSTRLEELLPAVSSGKNIDANDAVISNSVAQARHHHHHH

Epitopes of protein 0 -----  
0] pos= 306 score=0.000960 unnormalised=0.1086000000 EAATQLQQY  
1] pos= 402 score=0.003946 unnormalised=0.4466000000 PTDSQDTTI  
2] pos= 414 score=0.010759 unnormalised=1.2176000000 VVDPDDGSY  
3] pos= 420 score=0.005298 unnormalised=0.5996000000 GSYGEYQSY  
4] pos= 596 score=0.027229 unnormalised=3.0816000000 VTLDGQQFY  
5] pos= 597 score=0.018145 unnormalised=2.0536000000 TLDGQQFYW  
6] pos= 628 score=0.007295 unnormalised=0.8256000000 LSAIALGVY  
7] pos= -1 score=0.926368 unnormalised=104.8410000000 non-binding event

=====  
Allele: A0101  
Pseudo sequence: KAVHAEQRNKAQTRA  
Threshold: 9.456400  
Max score: 29.236000

-----  
Antigen sequence file: /opt/lampp/htdocs/C-IMMSIM/Jobs/input/50712\_20260522-092940\_5\_XkLfjnfTr3nx.FSA\_1\_001  
-----

MARGKKIGYSGLSRQTKDKAAEAAAAPAPAPAEVTPAAAPVVAPAPAPAEAKKSEESDDMGFLFDVAKNVAESAAE  
AAAPAEAAAAPAPAPVVKEAKKEAAKMDSRPQKIWMAPSLTESMDYHKILTAGLSVQQGIVRQVIVPYQVNNLEEI  
CQLIIQAFEAGVDFQEFLLIHQGMHVMAGHDANDAVISNSVAQARFSGLLIVKTVLDHILKQTERGVRLHPLARTAKVKN  
EVNSFLSSLAKHGEYAPFARLLNLSGVNLEHGLFPQLSAIALGVATAHGSTLAGVNVGEQYQQLREAAATLQQYAESRE  
LDHLGLDDQEKKILMNFHQKNEISFQQTAMVTLRKRERLAKLTEAITAASLPKTSGHDDDDIPFPGPINDDDNPGHQD  
DDPTDSQDTTIPDVVVDVDDGSYGEYQSYSENGMNPDDLVLFDLDEEDTKPVPNRSTKGGQKNSQKQGHIEGRQTQSR  
PIQNVPGPHRTIHHASAPLTDNDRRNEPSGSTSPRLTPIINEEADPLDDADDETSLLPPLSDDEEQDRDGTNRTPTVAP  
PAPVYRDHSEKKELPQDEQQDQDHEKEAMNEENRFVTLDGQFYWPVMNHKNKFMAILQHHCPPGQLSAIALGVYQVNVN  
NLEEIRLEELLPAVFPQLSAIALFLSFASLFLQTNAMVTLRAAYISFQQTAMVTLRKEVQGGIVRQVIVPYQFARLLN  
LSGVNLEHLSAIALGVATAHGSTRLEELLPAVSSGKNIDANDAVISNSVAQARHHHHHH

Epitopes of protein 0 -----  
0] pos= 306 score=0.000960 unnormalised=0.1086000000 EAATQLQQY  
1] pos= 402 score=0.003946 unnormalised=0.4466000000 PTDSQDTTI  
2] pos= 414 score=0.010759 unnormalised=1.2176000000 VVDPDDGSY  
3] pos= 420 score=0.005298 unnormalised=0.5996000000 GSYGEYQSY  
4] pos= 596 score=0.027229 unnormalised=3.0816000000 VTLDGQQFY  
5] pos= 597 score=0.018145 unnormalised=2.0536000000 TLDGQQFYW  
6] pos= 628 score=0.007295 unnormalised=0.8256000000 LSAIALGVY  
7] pos= -1 score=0.926368 unnormalised=104.8410000000 non-binding event

Allele: B0702  
Pseudo sequence: KAAREEQQIKAQTRE  
Threshold: 8.702800  
Max score: 28.406000

-----  
Antigen sequence file: /opt/lampp/htdocs/C-IMMSIM/Jobs/input/50712\_20260522-092940\_5\_XkLfjnfTr3nx.FSA\_1\_001  
-----

MARGKKIGYSGLSRQTKDKAAEAAAAPAPAPEVTPAAAPVVAPAPAPAEAKKSEESDDMGFLFDVAKNVAESAEE  
AAAPAEAAAAPAPAPVVKAEAKKEAAKMSRPPQKIWMAPSLTESDMYHKILTAGLSVQQGIVRQVIVPYQVNNLEEI  
CQLIIQAFEAGVDFQEFLLIHQGMHMVAGHDANDAVISNSVAQARFSGLLIVKTVLDHILKQTERGVRHLPLARTAKVKN  
EVNSFLSSLAKHGEYAPFARLLNLSGVNNLEHGLFPQLSAIALGVATAHGSTLAGVNVGEQYQQLREAATLQYAESRE  
LDHLGLDDQEKKILMNFHQKNEISFQQTAMVTLRERLAKL TEAITAASLPKTSGHDDDDIPFPGPINDDDNPGHQD  
DDPTDSQDTTIPDVVDDPDDGSYGEYQSYSENGMNPDDLVLFDLDEEDTKPVPNRSTKGGQKNSQKQGHIEGRQTQSR  
PIQNVPGPHRTIIHHASAPLTDNRRNEPSPGTSRPLTPINEEADPLDADDETSLLPPLSDDEEQDRDGTNRTPVAP  
PAPVYRDHSEKKELPQDEQQDQDHEKEAMNEENRFVTLDGQQFYWPMNHKNKFMALQHHCPGPGQLSAIALGVYQVN  
NLEEIRLEELLPAVFPQLSAIALFLSFASLFLQTNAMVTLRAAYISFQQTAMVTLRKEVQQGIVRQVIVPYQFARLLN  
LSGVNNLEHLSAIALGVATAHGSTRLEELLPAVSSGKNIDANDAVISNSVAQARHHHHHH

Epitopes of protein 0 -----

|     |      |     |                |                             |                   |
|-----|------|-----|----------------|-----------------------------|-------------------|
| 0]  | pos= | 25  | score=0.018842 | unnormalised=3.0192000000   | APAAPAPAP         |
| 1]  | pos= | 28  | score=0.014018 | unnormalised=2.2462000000   | APAPAPEVT         |
| 2]  | pos= | 30  | score=0.026169 | unnormalised=4.1932000000   | APAPEVTPA         |
| 3]  | pos= | 32  | score=0.014717 | unnormalised=2.3582000000   | APEVTPAAA         |
| 4]  | pos= | 36  | score=0.019129 | unnormalised=3.0652000000   | TPAAAPVVA         |
| 5]  | pos= | 40  | score=0.029114 | unnormalised=4.6652000000   | APVVAPAPA         |
| 6]  | pos= | 44  | score=0.035873 | unnormalised=5.7482000000   | APAPAPAEA         |
| 7]  | pos= | 82  | score=0.025826 | unnormalised=4.1382000000   | APAEAAAA          |
| 8]  | pos= | 88  | score=0.008495 | unnormalised=1.3612000000   | AAAPAPAPV         |
| 9]  | pos= | 92  | score=0.008788 | unnormalised=1.4082000000   | APAPVVKEA         |
| 10] | pos= | 118 | score=0.009637 | unnormalised=1.5442000000   | APSLTESDM         |
| 11] | pos= | 148 | score=0.003615 | unnormalised=0.5792000000   | IPVYQVNNL         |
| 12] | pos= | 229 | score=0.020702 | unnormalised=3.3172000000   | HPLARTAKV         |
| 13] | pos= | 255 | score=0.026231 | unnormalised=4.2032000000   | APFARLLNL         |
| 14] | pos= | 274 | score=0.035823 | unnormalised=5.7402000000   | FPQLSAIAL         |
| 15] | pos= | 654 | score=0.035823 | unnormalised=5.7402000000   | FPQLSAIAL         |
| 16] | pos= | 709 | score=0.012907 | unnormalised=2.0682000000   | IPVYQFARL         |
| 17] | pos= | -1  | score=0.654290 | unnormalised=104.8410000000 | non-binding event |

=====  
Allele: B0702  
Pseudo sequence: KAAREEQQIKAQTRE  
Threshold: 8.702800  
Max score: 28.406000

-----  
Antigen sequence file: /opt/lampp/htdocs/C-IMMSIM/Jobs/input/50712\_20260522-092940\_5\_XkLfjnfTr3nx.FSA\_1\_001  
-----

MARGKKIGYSGLSRQTKDKAAEAAAAPAPAPEVTPAAAPVVAPAPAPAEAKKSEESDDMGFLFDVAKNVAESAEE  
AAAPAEAAAAPAPAPVVKAEAKKEAAKMSRPPQKIWMAPSLTESDMYHKILTAGLSVQQGIVRQVIVPYQVNNLEEI  
CQLIIQAFEAGVDFQEFLLIHQGMHMVAGHDANDAVISNSVAQARFSGLLIVKTVLDHILKQTERGVRHLPLARTAKVKN  
EVNSFLSSLAKHGEYAPFARLLNLSGVNNLEHGLFPQLSAIALGVATAHGSTLAGVNVGEQYQQLREAATLQYAESRE  
LDHLGLDDQEKKILMNFHQKNEISFQQTAMVTLRERLAKL TEAITAASLPKTSGHDDDDIPFPGPINDDDNPGHQD  
DDPTDSQDTTIPDVVDDPDDGSYGEYQSYSENGMNPDDLVLFDLDEEDTKPVPNRSTKGGQKNSQKQGHIEGRQTQSR  
PIQNVPGPHRTIIHHASAPLTDNRRNEPSPGTSRPLTPINEEADPLDADDETSLLPPLSDDEEQDRDGTNRTPVAP  
PAPVYRDHSEKKELPQDEQQDQDHEKEAMNEENRFVTLDGQQFYWPMNHKNKFMALQHHCPGPGQLSAIALGVYQVN  
NLEEIRLEELLPAVFPQLSAIALFLSFASLFLQTNAMVTLRAAYISFQQTAMVTLRKEVQQGIVRQVIVPYQFARLLN  
LSGVNNLEHLSAIALGVATAHGSTRLEELLPAVSSGKNIDANDAVISNSVAQARHHHHHH

```

Epitopes of protein 0 -----
0] pos= 25 score=0.018842 unnormalised=3.0192000000 APAAPAPAP
1] pos= 28 score=0.014018 unnormalised=2.2462000000 APAPAPEVT
2] pos= 30 score=0.026169 unnormalised=4.1932000000 APAPEVTPA
3] pos= 32 score=0.014717 unnormalised=2.3582000000 APEVTPAAA
4] pos= 36 score=0.019129 unnormalised=3.0652000000 TPAAAPVVA
5] pos= 40 score=0.029114 unnormalised=4.6652000000 APVVAPAPA
6] pos= 44 score=0.035873 unnormalised=5.7482000000 APAPAPAEA
7] pos= 82 score=0.025826 unnormalised=4.1382000000 APAEAAAAA
8] pos= 88 score=0.008495 unnormalised=1.3612000000 AAAPAPAPV
9] pos= 92 score=0.008788 unnormalised=1.4082000000 APAPVVKEA
10] pos= 118 score=0.009637 unnormalised=1.5442000000 APSLTESDM
11] pos= 148 score=0.003615 unnormalised=0.5792000000 IPVYQVNNL
12] pos= 229 score=0.020702 unnormalised=3.3172000000 HPLARTAKV
13] pos= 255 score=0.026231 unnormalised=4.2032000000 APFARLLNL
14] pos= 274 score=0.035823 unnormalised=5.7402000000 FPQLSAIAL
15] pos= 654 score=0.035823 unnormalised=5.7402000000 FPQLSAIAL
16] pos= 709 score=0.012907 unnormalised=2.0682000000 IPVYQFARL
17] pos= -1 score=0.654290 unnormalised=104.8410000000 non-binding event

```

DoPeptideList\_II:

Given the antigen injected creates the list of peptides for all the NumAgProts proteins and for all i.e., 2 MHCII molecules

Read class II peptide list from file? NO

```

Allele: DRB1_0101
Pseudo sequence: KAFAHVEQRKAQTRV
Threshold: 2.392440
Max score: 26.461000

```

Antigen sequence file: /opt/lampp/htdocs/C-IMMSIM/Jobs/input/50712\_20260522-092940\_5\_XkLfjnfTr3nx.FSA\_1\_001

```

MARGKKIGYSGLSRQTKDKAAEAAAAPAPAPAPEVTPAAAPVVAPAPAPAEAKKSEESDDMGFGLFDVAKNVAESAEE
AAAPAEAAAAPAPAPVVKEAKKEAAKMDSRPQKIWMAPSLTESDMYHKILTAGLSVQQGIVRQVPIPVYQVNNLEEI
CQLIIQAFEAGVDFQEFLLIHQGMHVMVAGHDANDAVISNSVAQARFSGLLIVKTVLDHILQKTERGVRLHPLARTAKVKN
EVNSFLSSSLAKHGHEYAPFARLLNLGSGVNNLEHGLFPQLSAIALGVATAHGSTLAGVNVGEGYQQLREAAATLQQYAESRE
LDHLGLDDQEKKILMNFHQKNEISFQQTNAMVTLRKRERLAKLTEAITAASLPKTSGHDDDDIPFPGPINDDDNPGHQD
DDPDSQDQTTIPDVVVDPPDGSYGEYQSYSENGMNAPDDLVLFDLDEDTKVPVNRSTKGGQKNSQKGGHIEGRQTQSR
PIQNVPGPHRTIHHASAPLTDNDRRNEPSTSPRLTPINEEADPLDDADDETSPLPLESDDEEQDRDGTNRTPVAP
PAPVYRDHSEKELPQDEQDQDHEKEAMNEENRFVTLGQQFYWPVMNHKNKFMAILQHHCPCGGQLSAIALGVYQVN
NLEEIRLEELLPAVFPQLSAIALFLSFASLFLQTNAMVTLRAAYISFQQTNAMVTLRKEVQQGIVRQVPIPVYQFARLLN
LSGVNNLEHLSAIALGVATAHGSTRLEELLPAVSSGKNIDANDAVISNSVAQARHHHHH

```

```

Epitopes of protein 0 -----
0] pos= 8 score=0.042755 unnormalised=11.8545600000 YSGLKSRQT
1] pos= 35 score=0.011590 unnormalised=3.2135600000 VTPAAAPVV
2] pos= 42 score=0.015056 unnormalised=4.1745600000 VVAPAPAPA
3] pos= 66 score=0.011024 unnormalised=3.0565600000 FDVAKNVAA
4] pos= 72 score=0.005993 unnormalised=1.6615600000 VAAESAEEA
5] pos= 114 score=0.001077 unnormalised=0.2985600000 KIWMAPSLT
6] pos= 128 score=0.025454 unnormalised=7.0575600000 YHKILTAGL
7] pos= 142 score=0.003771 unnormalised=1.0455600000 IVRQVPIPV
8] pos= 178 score=0.007385 unnormalised=2.0475600000 LIHQGMHVM
9] pos= 183 score=0.021249 unnormalised=5.8915600000 MHMVAGHDA

```

|     |          |                |                            |                   |
|-----|----------|----------------|----------------------------|-------------------|
| 10] | pos= 205 | score=0.014014 | unnormalised=3.8855600000  | FSGLLIVKT         |
| 11] | pos= 237 | score=0.002271 | unnormalised=0.6295600000  | VKNEVNSFL         |
| 12] | pos= 241 | score=0.015972 | unnormalised=4.4285600000  | VNSFLSSLA         |
| 13] | pos= 244 | score=0.013783 | unnormalised=3.8215600000  | FLSSLAKHG         |
| 14] | pos= 257 | score=0.038532 | unnormalised=10.6835600000 | FARLLNLSG         |
| 15] | pos= 260 | score=0.011623 | unnormalised=3.2225600000  | LLNLSGVNN         |
| 16] | pos= 273 | score=0.013191 | unnormalised=3.6575600000  | LFPQLSAIA         |
| 17] | pos= 274 | score=0.034424 | unnormalised=9.5445600000  | FPQLSAIAL         |
| 18] | pos= 284 | score=0.005196 | unnormalised=1.4405600000  | VATAHGSTL         |
| 19] | pos= 301 | score=0.038229 | unnormalised=10.5995600000 | YQQLREAAAT        |
| 20] | pos= 336 | score=0.013332 | unnormalised=3.6965600000  | FHQKKNEIS         |
| 21] | pos= 343 | score=0.006743 | unnormalised=1.8695600000  | ISFQQTNAM         |
| 22] | pos= 345 | score=0.033273 | unnormalised=9.2255600000  | FQQTAMVT          |
| 23] | pos= 351 | score=0.002296 | unnormalised=0.6365600000  | MVTLRKERL         |
| 24] | pos= 481 | score=0.007226 | unnormalised=2.0035600000  | IQNVPGPHR         |
| 25] | pos= 491 | score=0.038330 | unnormalised=10.6275600000 | IHHASAPLT         |
| 26] | pos= 595 | score=0.013938 | unnormalised=3.8645600000  | FVTLDGQQF         |
| 27] | pos= 653 | score=0.006209 | unnormalised=1.7215600000  | VFPQLSAIA         |
| 28] | pos= 654 | score=0.034424 | unnormalised=9.5445600000  | FPQLSAIAL         |
| 29] | pos= 657 | score=0.005571 | unnormalised=1.5445600000  | LSAIALFLS         |
| 30] | pos= 660 | score=0.004698 | unnormalised=1.3025600000  | IALFLSFAS         |
| 31] | pos= 663 | score=0.030784 | unnormalised=8.5355600000  | FLSFASLFL         |
| 32] | pos= 669 | score=0.017263 | unnormalised=4.7865600000  | LFLQTNAMV         |
| 33] | pos= 670 | score=0.028671 | unnormalised=7.9495600000  | FLQTNAMVT         |
| 34] | pos= 671 | score=0.002794 | unnormalised=0.7745600000  | LQTNAMVTL         |
| 35] | pos= 676 | score=0.035682 | unnormalised=9.8935600000  | MVTLRAAYI         |
| 36] | pos= 684 | score=0.006743 | unnormalised=1.8695600000  | ISFQQTNAM         |
| 37] | pos= 686 | score=0.033273 | unnormalised=9.2255600000  | FQQTAMVT          |
| 38] | pos= 703 | score=0.003771 | unnormalised=1.0455600000  | IVRQRVIPV         |
| 39] | pos= 712 | score=0.003699 | unnormalised=1.0255600000  | YQFARLLNL         |
| 40] | pos= 714 | score=0.038532 | unnormalised=10.6835600000 | FARLLNLSG         |
| 41] | pos= 717 | score=0.011623 | unnormalised=3.2225600000  | LLNLSGVNN         |
| 42] | pos= 723 | score=0.003800 | unnormalised=1.0535600000  | VNNLEHLSA         |
| 43] | pos= 726 | score=0.037799 | unnormalised=10.4805600000 | LEHLSAIAL         |
| 44] | pos= 745 | score=0.008301 | unnormalised=2.3015600000  | LEELLPAVS         |
| 45] | pos= -1  | score=0.238643 | unnormalised=66.1680000000 | non-binding event |

=====  
Allele: DRB1\_0101  
Pseudo sequence: KAFAHVEQRKAQTRV  
Threshold: 2.392440  
Max score: 26.461000

-----  
Antigen sequence file: /opt/lampp/htdocs/C-IMMSIM/Jobs/input/50712\_20260522-092940\_5\_XkLfjnfTr3nx.FSA\_1\_001  
-----

MARGKKIGYSGLSRQTKDKAAEAAAPAAPAPEVTPAAAPVVAPAPAPAEAKKSEESDDMGFLFDVAKNVAESAEE  
AAAPAEAAAAPAPAPVVKEAKKEAAKMDSRPQKIWMAPSLTESDMYHKILTAGLSVQQGIVRQRVIPVYQVNNLEEI  
CQLIIQAFEAGVDFQEFLLIHQGMHMVAGHDANDAVISNSVAQARFSGLLIVKTVLDHILKQTERGVRHLPLARTAKVKN  
EVNSFLSSLAKHGEYAPFARLLNLSGVNNLEHGLFQPQLSAIALGVATAHGSTLAGVNVGEQYQQLREAAATLQQAESRE  
LDHLGLDDQEKILMNFHQKKNEISFQQTAMVTLRKERLAKL TEA ITAASLPKTS GHDDDDIPFP GPINDDDNPGHQD  
DDPDTSDQTTIPDVVVDPDDGSYGEYQSYSENGMNPDDLVLFDLDDDETKPVPNRSTKGGQKNSQKQGHIEGRQTQSR  
PIQNVPGPHRTIHHASAPLTDNDRRNEPSPGTSPLTPINEEADPLDADDETSPLPLESDDEEQDRDGTNRTPTVAP  
PAPVYRDHSEKKELPQDEQDQDHEKEAMNEENRFVTLDGQQFYWPVMNHKNKFMAILQHHCPCPGQLSAIALGVYQVN  
NLEEIRLEELLPAVFPQLSAIALFLSFASLFLQTNAMVTLRAAYISFQQTAMVTLRKEVQGGIVRQRVIPVYQFARLLN  
LSGVNNLEHLSAIALGVATAHGSTRLEELLPAVSSGKNIDANDAVISNSVAQARHHHHHH

Epitopes of protein 0 -----  
0] pos= 8 score=0.042755 unnormalised=11.8545600000 YSGLKSRQT  
1] pos= 35 score=0.011590 unnormalised=3.2135600000 VTPAAAPVV  
2] pos= 42 score=0.015056 unnormalised=4.1745600000 VVAPAPAPA  
3] pos= 66 score=0.011024 unnormalised=3.0565600000 FDVAKNVAA

|     |          |                |                            |                   |
|-----|----------|----------------|----------------------------|-------------------|
| 4]  | pos= 72  | score=0.005993 | unnormalised=1.6615600000  | VAAESAAEA         |
| 5]  | pos= 114 | score=0.001077 | unnormalised=0.2985600000  | KIWMAPSLT         |
| 6]  | pos= 128 | score=0.025454 | unnormalised=7.0575600000  | YHKLLTAGL         |
| 7]  | pos= 142 | score=0.003771 | unnormalised=1.0455600000  | IVRQRVIPV         |
| 8]  | pos= 178 | score=0.007385 | unnormalised=2.0475600000  | LIHQGMHMV         |
| 9]  | pos= 183 | score=0.021249 | unnormalised=5.8915600000  | MHMVAGHDA         |
| 10] | pos= 205 | score=0.014014 | unnormalised=3.8855600000  | FSGLLIVKT         |
| 11] | pos= 237 | score=0.002271 | unnormalised=0.6295600000  | VKNEVNSFL         |
| 12] | pos= 241 | score=0.015972 | unnormalised=4.4285600000  | VNSFLSSLA         |
| 13] | pos= 244 | score=0.013783 | unnormalised=3.8215600000  | FLSSLAKHG         |
| 14] | pos= 257 | score=0.038532 | unnormalised=10.6835600000 | FARLLNLSG         |
| 15] | pos= 260 | score=0.011623 | unnormalised=3.2225600000  | LLNLSGVNN         |
| 16] | pos= 273 | score=0.013191 | unnormalised=3.6575600000  | LFPQLSAIA         |
| 17] | pos= 274 | score=0.034424 | unnormalised=9.5445600000  | FPQLSAIAL         |
| 18] | pos= 284 | score=0.005196 | unnormalised=1.4405600000  | VATAHGSTL         |
| 19] | pos= 301 | score=0.038229 | unnormalised=10.5995600000 | YQQLREAAAT        |
| 20] | pos= 336 | score=0.013332 | unnormalised=3.6965600000  | FHQKKEIS          |
| 21] | pos= 343 | score=0.006743 | unnormalised=1.8695600000  | ISFQQTNAM         |
| 22] | pos= 345 | score=0.033273 | unnormalised=9.2255600000  | FQQTAMVT          |
| 23] | pos= 351 | score=0.002296 | unnormalised=0.6365600000  | MVTLRKERL         |
| 24] | pos= 481 | score=0.007226 | unnormalised=2.0035600000  | IQNVPGPHR         |
| 25] | pos= 491 | score=0.038330 | unnormalised=10.6275600000 | IHHASAPLT         |
| 26] | pos= 595 | score=0.013938 | unnormalised=3.8645600000  | FVTLDGQQF         |
| 27] | pos= 653 | score=0.006209 | unnormalised=1.7215600000  | VFPQLSAIA         |
| 28] | pos= 654 | score=0.034424 | unnormalised=9.5445600000  | FPQLSAIAL         |
| 29] | pos= 657 | score=0.005571 | unnormalised=1.5445600000  | LSAIALFLS         |
| 30] | pos= 660 | score=0.004698 | unnormalised=1.3025600000  | IALFLSFAS         |
| 31] | pos= 663 | score=0.030784 | unnormalised=8.5355600000  | FLSFASLFL         |
| 32] | pos= 669 | score=0.017263 | unnormalised=4.7865600000  | LFLQTNAMV         |
| 33] | pos= 670 | score=0.028671 | unnormalised=7.9495600000  | FLQTNAMVT         |
| 34] | pos= 671 | score=0.002794 | unnormalised=0.7745600000  | LQTNAMVTL         |
| 35] | pos= 676 | score=0.035682 | unnormalised=9.8935600000  | MVTLRAAYI         |
| 36] | pos= 684 | score=0.006743 | unnormalised=1.8695600000  | ISFQQTNAM         |
| 37] | pos= 686 | score=0.033273 | unnormalised=9.2255600000  | FQQTAMVT          |
| 38] | pos= 703 | score=0.003771 | unnormalised=1.0455600000  | IVRQRVIPV         |
| 39] | pos= 712 | score=0.003699 | unnormalised=1.0255600000  | YQFARLLNL         |
| 40] | pos= 714 | score=0.038532 | unnormalised=10.6835600000 | FARLLNLSG         |
| 41] | pos= 717 | score=0.011623 | unnormalised=3.2225600000  | LLNLSGVNN         |
| 42] | pos= 723 | score=0.003800 | unnormalised=1.0535600000  | VNNLEHLSA         |
| 43] | pos= 726 | score=0.037799 | unnormalised=10.4805600000 | LEHLSAIAL         |
| 44] | pos= 745 | score=0.008301 | unnormalised=2.3015600000  | LEELLPAVS         |
| 45] | pos= -1  | score=0.238643 | unnormalised=66.1680000000 | non-binding event |
