# Supplementary material
Source: Research Square preprint supplement (doi:10.21203/rs.3.rs-9834795/v1)
Supplement: Supplementary file 8 [file 891422663c5ff43070088287.docx]

**Solubility of Vaccine**

Sequences: [input.fasta](https://loschmidt.chemi.muni.cz/soluprot/jobs/64/64e317e54d/input.fasta)

| **Protein** | **Solubility** |
| --- | --- |
|  | 0.765 |

Solubility score above 0.5 (towards green color) indicates soluble expression, score below 0.5 (towards red color) indicates insoluble expression in *Escherichia coli*.
