# Supplementary material
Source: Research Square preprint supplement (doi:10.21203/rs.3.rs-9834795/v1)
Supplement: Supplementary file 9 [file 956a1a69a91158d07592193c.docx]

>EMBOSS_001

ATGGCGCGCGGCAAAAAAATTGGCTATAGCGGCCTGAAAAGCCGCCAGACCAAAGATAAA

GCGGCGGAAGCGGCGGCGCCGGCGGCGCCGGCGCCGGCGCCGGAAGTGACCCCGGCGGCG

GCGCCGGTGGTGGCGCCGGCGCCGGCGCCGGCGGAAGCGAAAAAAAGCGAAGAAAGCGAT

GATATGGGCTTTGGCCTGTTTGATGTGGCGAAAAACGTGGCGGCGGAAAGCGCGGCGGAA

GCGGCGGCGCCGGCGGAAGAAGCGGCGGCGGCGCCGGCGCCGGCGCCGGTGGTGAAAGAA

GCGAAAAAAGAAGCGGCGGCGAAAATGGATAGCCGCCCGCAGAAAATTTGGATGGCGCCG

AGCCTGACCGAAAGCGATATGGATTATCATAAAATTCTGACCGCGGGCCTGAGCGTGCAG

CAGGGCATTGTGCGCCAGCGCGTGATTCCGGTGTATCAGGTGAACAACCTGGAAGAAATT

TGCCAGCTGATTATTCAGGCGTTTGAAGCGGGCGTGGATTTTCAGGAATTTCTGCTGATT

CATCAGGGCATGCATATGGTGGCGGGCCATGATGCGAACGATGCGGTGATTAGCAACAGC

GTGGCGCAGGCGCGCTTTAGCGGCCTGCTGATTGTGAAAACCGTGCTGGATCATATTCTG

CAGAAAACCGAACGCGGCGTGCGCCTGCATCCGCTGGCGCGCACCGCGAAAGTGAAAAAC

GAAGTGAACAGCTTTCTGAGCAGCCTGGCGAAACATGGCGAATATGCGCCGTTTGCGCGC

CTGCTGAACCTGAGCGGCGTGAACAACCTGGAACATGGCCTGTTTCCGCAGCTGAGCGCG

ATTGCGCTGGGCGTGGCGACCGCGCATGGCAGCACCCTGGCGGGCGTGAACGTGGGCGAA

CAGTATCAGCAGCTGCGCGAAGCGGCGACCCAGCTGCAGCAGTATGCGGAAAGCCGCGAA

CTGGATCATCTGGGCCTGGATGATCAGGAAAAAAAAATTCTGATGAACTTTCATCAGAAA

AAAAACGAAATTAGCTTTCAGCAGACCAACGCGATGGTGACCCTGCGCAAAGAACGCCTG

GCGAAACTGACCGAAGCGATTACCGCGGCGAGCCTGCCGAAAACCAGCGGCCATGATGAT

GATGATGATATTCCGTTTCCGGGCCCGATTAACGATGATGATAACCCGGGCCATCAGGAT

GATGATCCGACCGATAGCCAGGATACCACCATTCCGGATGTGGTGGTGGATCCGGATGAT

GGCAGCTATGGCGAATATCAGAGCTATAGCGAAAACGGCATGAACGCGCCGGATGATCTG

GTGCTGTTTGATCTGGATGATGAAGATACCAAACCGGTGCCGAACCGCAGCACCAAAGGC

GGCCAGCAGAAAAACAGCCAGAAAGGCCAGCATATTGAAGGCCGCCAGACCCAGAGCCGC

CCGATTCAGAACGTGCCGGGCCCGCATCGCACCATTCATCATGCGAGCGCGCCGCTGACC

GATAACGATCGCCGCAACGAACCGAGCGGCAGCACCAGCCCGCGCCTGACCCCGATTAAC

GAAGAAGCGGATCCGCTGGATGATGCGGATGATGAAACCAGCAGCCTGCCGCCGCTGGAA

AGCGATGATGAAGAACAGGATCGCGATGGCACCAGCAACCGCACCCCGACCGTGGCGCCG

CCGGCGCCGGTGTATCGCGATCATAGCGAAAAAAAAGAACTGCCGCAGGATGAACAGCAG

GATCAGGATCATACCGAAAAAGAAGCGATGAACGAAGAAAACCGCTTTGTGACCCTGGAT

GGCCAGCAGTTTTATTGGCCGGTGATGAACCATAAAAACAAATTTATGGCGATTCTGCAG

CATCATTGCCCGGGCCCGGGCCAGCTGAGCGCGATTGCGCTGGGCGTGTATCAGGTGAAC

AACCTGGAAGAAATTCGCCTGGAAGAACTGCTGCCGGCGGTGTTTCCGCAGCTGAGCGCG

ATTGCGCTGTTTCTGAGCTTTGCGAGCCTGTTTCTGCAGACCAACGCGATGGTGACCCTG

CGCGCGGCGTATATTAGCTTTCAGCAGACCAACGCGATGGTGACCCTGCGCAAAGAAGTG

CAGCAGGGCATTGTGCGCCAGCGCGTGATTCCGGTGTATCAGTTTGCGCGCCTGCTGAAC

CTGAGCGGCGTGAACAACCTGGAACATCTGAGCGCGATTGCGCTGGGCGTGGCGACCGCG

CATGGCAGCACCCGCCTGGAAGAACTGCTGCCGGCGGTGAGCAGCGGCAAAAACATTGAT

GCGAACGATGCGGTGATTAGCAACAGCGTGGCGCAGGCGCGCCATCATCATCATCATCAT
