# Supplementary material
Source: Research Square preprint supplement (doi:10.21203/rs.3.rs-9834795/v1)
Supplement: Supplementary file 9 [file 5424f55ca4e6d611d67aa236.xlsx]

## Sheet: Sheet1
Peptide	Antigenecity	Allergenecity
MDSRPQKIWMAPSLTESDMDYHKILTAGLSVQQGIVRQRVIPVYQVNNLEEICQLIIQAFEAGVDFQE	Antigen	Non-allergen
FLLIHQGMHMVAGHDANDAVISNSVAQARFSGLLIVKTVLDHILQKTERGVRLHPLARTAKVKNEVNSF	Antigen	Non-allergen
LSSLAKHGEYAPFARLLNLSGVNNLEHGLFPQLSAIALGVATAHGSTLAGVNVGEQYQQLREAAT	Antigen	Non-allergen
QLQQYAESRELDHLGLDDQEKKILMNFHQKKNEISFQQTNAMVTLRKERLAKLTEAITAASLPKTSGH	Antigen	Non-allergen
DDDDDIPFPGPINDDDNPGHQDDDPTDSQDTTIPDVVVDPDDGSYGEYQSYSENGMNAPDDLVLFDL	Antigen	Non-allergen
DDEDTKPVPNRSTKGGQQKNSQKGQHIEGRQTQSRPIQNVPGPHRTIHHASAPLTDNDRRNEPSGSTSPR	Antigen	Non-allergen
LTPINEEADPLDDADDETSSLPPLESDDEEQDRDGTSNRTPTVAPPAPVYRDHSEKKELPQDEQQDQDH	Antigen	Non-allergen
TEKEAMNEENRFVTLDGQQFYWPVMNHKNKFMAILQHH	Antigen	Non-allergen
