# Supplementary material
Source: Research Square preprint supplement (doi:10.21203/rs.3.rs-9834795/v1)
Supplement: Supplementary file 10 [file af09c7fcba47894f7dab7b7a.docx]

**Population Coverage Calculation Result**

Note: Following allele(s) are not available and therefore not included in the calculation, please note that allele names are case sensitive:
HLA-DRB3*02:02, HLA-DRB4*01:01, DQB1*03:01, HLA-DRB5*01:01,

| **population/area** | **Class II** | | |
| --- | --- | --- | --- |
| **coveragea** | **average_hitb** | **pc90c** |
| [World](https://tools.iedb.org/population/result/#World) | 61.9% | 1.47 | 0.26 |
|  |  |  |  |
| **Average** | **61.9** | **1.47** | **0.26** |
| **Standard deviation** | **0.0** | **0.0** | **0.0** |

a projected population coverage
b average number of epitope hits / HLA combinations recognized by the population
c minimum number of epitope hits / HLA combinations recognized by 90% of the population

***Population: World***

| **MHC class** | **Coverage** | **Average hit** | **PC90** |
| --- | --- | --- | --- |
| II | 61.9% | 1.47 | 0.26 |
| 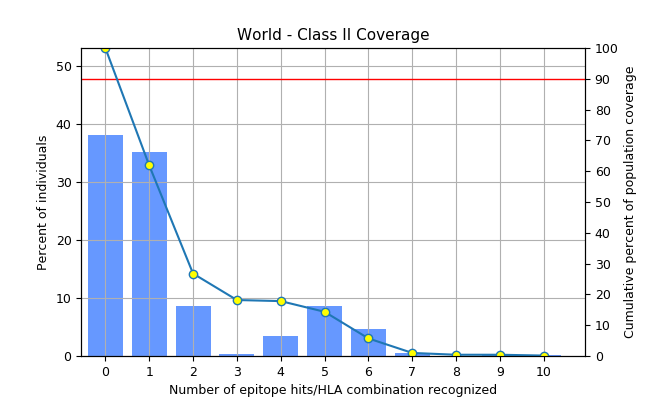 | | | |
| Top of Form  Bottom of Form | | | |
