# Supplementary material
Source: Research Square preprint supplement (doi:10.21203/rs.3.rs-9834795/v1)
Supplement: Supplementary file 11 [file af281e2f1fcedb46db33bf78.docx]

**Antigenic Results**

**Model selected: virus**

**Threshold for this model: 0.4**

**Your Sequence:**

MARGKKIGYSGLKSRQTKDKAAEAAAPAAPA
PAPEVTPAAAPVVAPAPAPAEAKKSEESDDM
GFGLFDVAKNVAAESAAEAAAPAEEAAAAPA
PAPVVKEAKKEAAAKMDSRPQKIWMAPSLTE
SDMDYHKILTAGLSVQQGIVRQRVIPVYQVN
NLEEICQLIIQAFEAGVDFQEFLLIHQGMHM
VAGHDANDAVISNSVAQARFSGLLIVKTVLD
HILQKTERGVRLHPLARTAKVKNEVNSFLSS
LAKHGEYAPFARLLNLSGVNNLEHGLFPQLS
AIALGVATAHGSTLAGVNVGEQYQQLREAAT
QLQQYAESRELDHLGLDDQEKKILMNFHQKK
NEISFQQTNAMVTLRKERLAKLTEAITAASL
PKTSGHDDDDDIPFPGPINDDDNPGHQDDDP
TDSQDTTIPDVVVDPDDGSYGEYQSYSENGM
NAPDDLVLFDLDDEDTKPVPNRSTKGGQQKN
SQKGQHIEGRQTQSRPIQNVPGPHRTIHHAS
APLTDNDRRNEPSGSTSPRLTPINEEADPLD
DADDETSSLPPLESDDEEQDRDGTSNRTPTV
APPAPVYRDHSEKKELPQDEQQDQDHTEKEA
MNEENRFVTLDGQQFYWPVMNHKNKFMAILQ
HHCPGPGQLSAIALGVYQVNNLEEIRLEELL
PAVFPQLSAIALFLSFASLFLQTNAMVTLRA
AYISFQQTNAMVTLRKEVQQGIVRQRVIPVY
QFARLLNLSGVNNLEHLSAIALGVATAHGST
RLEELLPAVSSGKNIDANDAVISNSVAQARH
HHHHH


Overall Prediction for the Protective Antigen =**0.5929**( Probable **ANTIGEN** ).
