# Supplementary material
Source: Research Square preprint supplement (doi:10.21203/rs.3.rs-9834795/v1)
Supplement: Supplementary file 12 [file d4c7a644b27f200730f8b815.docx]

**Allergenic Results**

**Results for your protein:**
MARGKKIGYSGLKSRQTKDKAAEAAAPAAPAPAPEVTPAAAPVVAPAPAPAEAKKSEESDDMGFGLFDVAKNVAAESAAEAAAPAEEAAAAPAPAPVVKEAKKEAAAKMDSRPQKIWMAPSLTESDMDYHKILTAGLSVQQGIVRQRVIPVYQVNNLEEICQLIIQAFEAGVDFQEFLLIHQGMHMVAGHDANDAVISNSVAQARFSGLLIVKTVLDHILQKTERGVRLHPLARTAKVKNEVNSFLSSLAKHGEYAPFARLLNLSGVNNLEHGLFPQLSAIALGVATAHGSTLAGVNVGEQYQQLREAATQLQQYAESRELDHLGLDDQEKKILMNFHQKKNEISFQQTNAMVTLRKERLAKLTEAITAASLPKTSGHDDDDDIPFPGPINDDDNPGHQDDDPTDSQDTTIPDVVVDPDDGSYGEYQSYSENGMNAPDDLVLFDLDDEDTKPVPNRSTKGGQQKNSQKGQHIEGRQTQSRPIQNVPGPHRTIHHASAPLTDNDRRNEPSGSTSPRLTPINEEADPLDDADDETSSLPPLESDDEEQDRDGTSNRTPTVAPPAPVYRDHSEKKELPQDEQQDQDHTEKEAMNEENRFVTLDGQQFYWPVMNHKNKFMAILQHHCPGPGQLSAIALGVYQVNNLEEIRLEELLPAVFPQLSAIALFLSFASLFLQTNAMVTLRAAYISFQQTNAMVTLRKEVQQGIVRQRVIPVYQFARLLNLSGVNNLEHLSAIALGVATAHGSTRLEELLPAVSSGKNIDANDAVISNSVAQARHHHHHH

- Most similar protein: sp|P04920|B3A2_HUMAN Anion exchange protein 2 OS=Homo sapiens GN=SLC4A2 PE=1 SV=4
- Classification based on the most similar protein: Probable NON-ALLERGEN
