# Supplementary material
Source: Research Square preprint supplement (doi:10.21203/rs.3.rs-9834795/v1)
Supplement: Supplementary file 13 [file df3532fe2ef146f5d39ea20b.docx]

**ProtParam – Results**

**Number of amino acids:** 739

**Theoretical pI:** 4.98

**Molecular weight:** 83286.68

**Total number of negatively charged residues (Asp + Glu):** 118

**Total number of positively charged residues (Arg + Lys):** 71

**Formula:** C3643H5674N1026O1169S23

**Total number of atoms:** 11535

**Extinction coefficients:**

Extinction coefficients are in units of M-1 cm-1, at 280 nm measured in water.

Ext. coefficient 53415

Abs 0.1% (=1 g/l) 0.641, assuming all pairs of Cys residues form cystines

Ext. coefficient 53290

Abs 0.1% (=1 g/l) 0.640, assuming all Cys residues are reduced

**Estimated half-life:**

The N-terminal of the sequence considered is M (Met).

The estimated half-life is: 30 hours (mammalian reticulocytes, in vitro).

>20 hours (yeast, in vivo).

>10 hours (Escherichia coli, in vivo).

**Instability index:**

The instability index (II) is computed to be 50.31

This classifies the protein as unstable.

**Aliphatic index:** 74.32

**Grand average of hydropathicity (GRAVY):**-0.691
